# Supplementary material for: Exposure to news grows less fragmented with an increase in mobile access
Source: PubMed Central journal article supplement — Proc Natl Acad Sci U S A. 2020 Oct 30;117(46):28678–83. doi: 10.1073/pnas.2006089117 (PMC7682382; doi:10.1073/pnas.2006089117), 2020-10-30
Supplement: pnas.2006089117.sapp.pdf [file pnas.2006089117.sapp.pdf]

## Supplementary Information

### Exposure to News Grows less Fragmented with an Increase in Mobile Access

Tian Yang<sup>1</sup>, Sílvia Majó-Vázquez<sup>2</sup>, Rasmus K. Nielsen<sup>2</sup>, Sandra González-Bailón<sup>1, \*</sup>

<sup>1</sup>University of Pennsylvania

<sup>2</sup>University of Oxford

\* Corresponding author: Sandra González-Bailón

**Email:** [sgonzalezbailon@asc.upenn.edu](mailto:sgonzalezbailon@asc.upenn.edu)

#### **This PDF file includes:**

##### Sections

1. Data
2. Co-Exposure Networks
3. Ideological Measures
4. QAP correlations and models
5. Node Removal Robustness Tests
6. Core Network Robustness Tests
7. References

##### Figures

- SI1. Overlap in News Sites Considered across Studies
- SI2. Density Trends according to Unfiltered Data
- SI3. Changes in Other Network Statistics
- SI4. Survey Data on Device Used to Access News
- SI5. Comparison of News Consuming Population and Total Online Population
- SI6. Comparison of Comscore and Gallup Measures of Party Affiliation
- SI7. Monthly Distributions of Favorability Scores (2018, MP)
- SI8. Correlation of Favorability Scores with Audience Reach and Engagement
- SI9. Correlation of Audience Overlap and Ideological Scores for Unfiltered Data
- SI10. Changes in Network Density for Different Node Removal Conditions (Raw Data)
- SI11. Changes in Network Density for Different Node Removal Conditions (PMI Data)
- SI12. Changes in Network Density for Different Node Removal Conditions (Backbone Data)
- SI13. Changes in Segregation Scores for Different Node Removal Conditions
- SI14. Changes in QAP Correlation for Different Node Removal Conditions
- SI15. Density Trends for Core Networks
- SI16. Segregation Scores for Core Networks
- SI17. QAP Correlations for Core Networks

##### Tables

- SI1. List of News Sites included in the Analyses (October 2014 – December 2018)

## 1. Data

We obtain our observational data from the following sources:

1. Comscore's Media Metrix for PC and Multi-Platform online usage. This panel offers estimates of media use for desktop-only and multi-platform (desktop, mobile and tablet), provided as monthly aggregates at the domain level. The estimates of audience reach (or market share) for a given domain rely on panels that are representative of the online population. In the description of methodology, Comscore reports that an average of ~ 250,000 panelists for desktop and ~35,500 for mobile are active on a given month in the US. Their measurement methodology relies on a combination of panel-based tracking (i.e., what panelists do while online) and census-based site analytics (i.e. traffic information generated at the site level). We compiled the list of news sites by retrieving the set of domains Comscore classifies in the category "News/Information". We then manually checked the list to exclude portals, search engines, and social media sites. Table S11 shows the list of news sites that we use in our analyses. We analyze audiences visiting these sites for the period October 2014 to December 2018 (data on a small subset of sites are only available since June 2016, these sites are excluded from the analyses that relate to the longer longitudinal trends). Across all these years, we collected data for the US population aged 18 and older, except for the year 2014 when our data targets the population aged 15 and older.

2. Comscore's Plan Metrix Multi-Platform. This panel, a subset of the larger Media Metrix panel, connects attitudes and other self-declared information with online behavior (i.e., websites visited) for the US population aged 18 and older. The survey responses include the questions about party affiliation and political outlook that we use in our analyses. In the description of their methodology, Comscore reports an average of ~ 20,000 panelists complete the survey each month. We analyze data for users that visit the news sites listed in table S11 for the period September 2017 to December 2018.

In order to get a sense of how our list of news sites compares to the lists used in recent prior work (1-4), we calculated the overlap of news sites across the five studies. We display the results in figure S11. Panel A shows the percentage of outlets included in each study (rows) that also appear in the other studies (columns). As the figure shows, the five studies have, in general, low overlap in the news domains they consider. Budak et al's study focuses on the 15 top news domains according to views among Bing users. These domains appear in all five studies (with the exception of Yahoo News, which we excluded from our data to be consistent with our decision not to analyze portals; this explains why our list does not have 100% overlap). Our list has the largest overlap with Peterson et al.'s paper, which makes sense since that study also considers web browsing behavior (the studies by Bakshy et al. and Grinberg et al. analyze Facebook and Twitter sharing behavior, respectively). The bars in panel B visualize the proportion of outlets used in our study that were included in the other studies. What this panel shows is that about half of our sites appear in at least one other study and about half appear only in our list (most of these are local news domains, e.g., 13wmaz.com, miamiherald.com).

Overall, the discrepancy among studies in the news sites analyzed derives from the fact that the lists of news sources are compiled from the bottom-up, e.g., only domains that gain some traction in terms of visits (on the web) or shares (in social media) end up in the data analyzed. In section

5 we run robustness tests to determine whether our main findings change if we exclude a subset  $N$  of news outlets from our data (they do not).

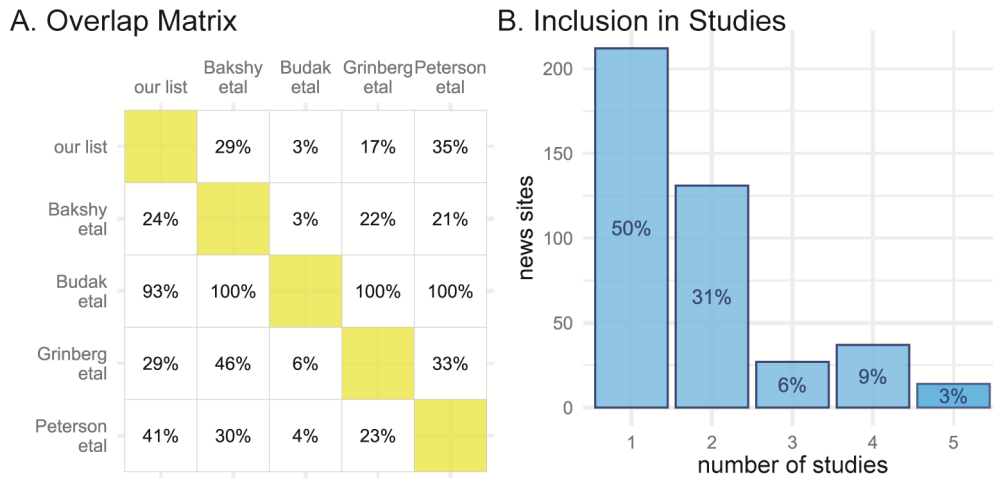

**Figure S11. Overlap in News Sites Considered across Studies.** In this figure, we assess the overlap across the lists of news sources used in recent research. Panel A shows that the five studies have, in general, low overlap in the news domains they consider. Panel B visualizes the proportion of outlets used in our study that were also included in the other studies: about half of our sites appear in at least one other study and about half appear only in our list.

## 2. Co-Exposure Networks

We build the co-exposure networks using the observed audience overlap between news sites. Comscore provides statistics of audience overlap, which we use to build the monthly networks for both Desktop and Multi-Platform access. Because the data is likely to contain random browsing behavior and noise, we filtered the networks according to two techniques. One relies on the pointwise mutual information measure of association (PMI), which we use to identify overlap that occurs to a greater extent than expected by chance. For a pair of news sites  $(i, j)$ , the PMI measure is defined as

$$PMI(i, j) = \log \frac{p(i, j)}{p(i)p(j)},$$

where  $p(i, j) = \frac{\text{online audience consuming } i \text{ and } j}{\text{total online audience}}$ ,  $p(i) = \frac{\text{online audience consuming } i}{\text{total online audience}}$ , and

$$p(j) = \frac{\text{online audience consuming } j}{\text{total online audience}}.$$

The filtered networks only retain the edges with a PMI larger than zero (with weighted edges).

**Table SI1. List of News Sites included in the Analyses (October 2014 – December 2018)**

|                            |                          |                      |                   |                       |
|----------------------------|--------------------------|----------------------|-------------------|-----------------------|
| 10tvweb                    | campusreform.org         | deseretnews          | idahostatesman    | lawnewz               |
| 11alive                    | cantonrep                | desmoinesregister    | ifyouonlynews     | legalinsurrection     |
| 12news                     | cbn                      | digitaljournal       | ijr               | lifeneews             |
| 13newsnow                  | cbslocal                 | dispatch             | independent       | lifesitenews          |
| 13wmaz                     | cbsnews                  | dowjones             | indystar          | lifelzette            |
| 9news                      | centredaily              | drudgereport         | inforum           | liveaction.org        |
| abclocal                   | charismanews             | eaglerising          | inquirer          | liverpoolecho         |
| abcnews                    | chicagotribune           | economist            | islandpacket      | ljworld               |
| about                      | chicksonright            | elitedaily           | itvnews           | lohud                 |
| abqjournal                 | chron                    | elnuevodia           | jacksonville      | louderwithcrowder     |
| activistpost               | chronicle                | endingthefed         | johnstonpressplc  | macon                 |
| Adn                        | cincinnati               | euronews             | joongangilbo      | mailonline/dailymail  |
| ahbelo                     | citizen-times            | expressnews          | journalnow        | mainetodaymedia       |
| americanthinker            | clarionledger            | fayobserver          | jsonline          | manchestereveningnews |
| americasfreedomfighters    | clashdaily               | firehouse            | judicialwatch.org | marketwatch           |
| ammoland                   | cnbc                     | firstcoastnews       | kait8             | mashable              |
| anonews.co                 | cnn                      | firstthings          | kansas            | mcclatchydc           |
| aplus                      | cnsnews                  | floridatoday         | kansascity        | mediageneral          |
| argusleader                | coed                     | forbes               | kare11            | mediaite              |
| arkansasonline             | collective-evolution     | foxnews              | katc              | menstrait             |
| asburyparkpress            | coloradoan               | freebeacon           | kcra              | metro                 |
| associatedpress            | commercialappeal         | freerepublic         | kens5             | miamiherald           |
| atlantablackstar           | conservativenewsandviews | fresnobee            | kentucky          | mic                   |
| australianbroadcastingcorp | conservativereview       | frontpagemag         | kgw               | michigan              |
| azcentral                  | conservativetribune      | ft                   | khou              | mirroronline          |
| ba-bamail                  | countercurrentnews       | fusion.net           | khq               | modbee                |
| baynews9                   | courierpostonline        | gainesville          | king5             | moonbattery           |
| bbcnews                    | csmonitor                | gazette              | kltv              | morningnewsusa        |
| belfasttelegraph           | dailycaller              | gothamist            | kmbc              | mrc.org               |
| bhmediagroup               | dailyherald              | grabien              | knoxnews          | msnbc                 |
| billoreilly                | dailykos                 | greenbaypressgazette | krem              | msnewsnow             |
| bizpacreview               | dailymulligan            | greenvilleonline     | kron4             | mynews13              |
| blackamericaweb            | dailyrecord              | hamptonroads         | krqe              | myrtlebeachonline     |
| bloomberg                  | dailysignal              | hannity              | ksbw              | naplesnews            |
| Bnd                        | dailystar                | havenews             | ksdk              | nationalreview        |
| boston                     | dailytidings             | heraldextra          | ksl               | navytimes             |
| bostonglobe                | dailyvoice               | heraldtribune        | ktuu              | nbcnews               |
| bostonherald               | dailywire                | historynet           | ktvb              | nccommunitygroup      |
| bradenton                  | dataomaha                | hngn                 | kvue              | newsadvance           |
| breitbart                  | deadstate.org            | hotair               | kxan              | newsbusters.org       |
| burlingtonfreepress        | delawareonline           | huffingtonpost       | lancasteronline   | newschannel10         |
| businessinsider            | delmarvanow              | humanevents          | lasvegassun       | newscoopaustralia     |
| buzzfeed                   | democratandchronicle     | ibtimesuk            | latimes           | newsday               |

**Table S11. List of News Sites included in the Analyses (continued)**

|                     |                     |                          |                    |                      |
|---------------------|---------------------|--------------------------|--------------------|----------------------|
| news-journalonline  | qz                  | sunherald                | toprightnews       | wdtn                 |
| newsmax             | rare.us             | sun-times                | townhall           | westernjournalism    |
| newsnow             | readingeagle        | takepart                 | trend-chaser       | wfaa                 |
| newsobserver        | realclearpolitics   | tallahassee              | tri-cityherald     | wgal                 |
| newsok              | reason              | tampabay                 | trinitymirrorgroup | wgrz                 |
| newsone             | recordonline        | tbo                      | truthandaction.org | whas11               |
| newspapers          | redstate            | tcpalm                   | truthrevolt.org    | wishtv               |
| news-press          | registerguard       | techcrunch               | tucson             | wisn                 |
| newstatesman        | rendermedia         | telegram                 | twcnews            | wistv                |
| newyorker           | reuters             | telegraphmediagroup      | twitchy            | wivb                 |
| nola                | revealnews.org      | tennessean               | upi                | wkow                 |
| noozley             | reverbpres          | theadvocate              | upworthy           | wkyc                 |
| northjersey         | reviewjournal       | theamericanconservative  | usatoday           | wlox                 |
| npr                 | rgj                 | theantimedia.org         | usherald           | wlwt                 |
| nwfailynews         | rushlimbaugh        | theatlantic              | usnews             | wmur                 |
| nydailynews         | sacbee              | theblaze                 | usuncut            | wnd                  |
| nypost              | sanluisobispo       | thecharlotteobserver     | vcstar             | wndu                 |
| nytimes             | savannahnow         | theconservativetreehouse | veteranstoday      | woodtv               |
| oann                | scoopnest           | thedailybeast            | vicemedia          | worldnewsdailyreport |
| observermedia       | scotsman            | thedesertsun             | voanews            | worldnewsnetwork     |
| occupydemocrats     | scrippsnationalnews | thediplomat              | voiceofeuropa      | wpbf                 |
| ocregister          | sctimes             | theepochtimes            | vox                | wpri                 |
| ogdennewspapersinc. | seacoastonline      | thefederalist            | walb               | wrcbtv               |
| ohio                | seattletimes        | thegatewaypundit         | walesonline        | wric                 |
| onewsnw             | sfexaminer          | theguardian              | wane               | wsbt                 |
| onewspage           | sj-r                | thehill                  | washingtonexaminer | wsfa                 |
| onlineathens        | skynews             | theledger                | washingtonpost     | wsj                  |
| ozock               | slate               | thenewamerican           | washingtontimes    | wthr                 |
| pbsfrontline        | sltrib              | theneworleansadvocate    | wate               | wtnh                 |
| pbsnewshour         | southbendtribune    | thenewtribune            | wattsupwiththat    | wtol                 |
| pe                  | southeastmissourian | theolympian              | wave3              | wtsp                 |
| philly              | spectator           | thepatriotnation.net     | wavy               | wwlp                 |
| pjmedia             | spectator.org       | therightscoop            | wbaltv             | wwltv                |
| pjstar              | spectrumlocalnews   | thestate                 | wbay               | wxyz                 |
| pnj                 | spokesman           | thesun                   | wbir               | wyff4                |
| politico            | standard            | thetab                   | wboc               | wzzm13               |
| postcrescent        | standardnews        | thetimes                 | wbtw               | yournationnews       |
| post-gazette        | starnewsonline      | theweek                  | wcax               |                      |
| poughkeepsiejournal | star-telegram       | thinkprogress.org        | wchstv             |                      |
| powerlineblog       | startribunenetwork  | threepercentnation       | wcnc               |                      |
| pressdemocrat       | statesmanjournal    | time                     | wcpo               |                      |
| propublica.org      | stripes             | timesfreepress           | wcsh6              |                      |
| providencejournal   | success             | toledoblade              | wdbj7              |                      |

The second technique is based on backbone extraction, which is well established in network science (5). This technique operates on the assumption of a null model of random weight distribution at the node level used to assess the significance of tie strength in the observed network. Significance is determined through a parameter alpha that can be interpreted as the conventional  $p$ -value. We use  $\alpha = 0.05$ , a threshold under which many more ties are eliminated compared to the PMI approach. The main text shows the networks filtered according to these two techniques. Figure SI2 shows the same trends according to the raw, unfiltered data. All three networks give a consistent picture of decreasing density for desktop data, and increasing density for multi-platform data.

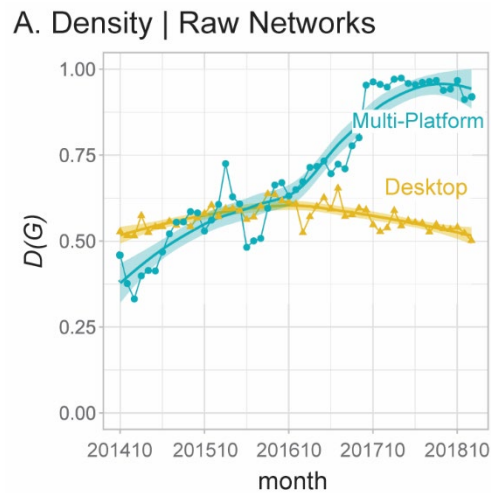

**Figure SI2. Density Trends according to Unfiltered Data.** This figure shows the evolution of density scores for the co-exposure networks prior to any thresholding eliminating the weakest ties.

Figure SI3 offers a summary of changes in other network statistics. In addition to density, we also looked at centralization, which is a graph-level measure of inequality in node connectivity (6); transitivity, which is a measure of clustering at the local, triadic level (7); and modularity, a measure of clustering at the meso-scale based on community detection (8). The co-exposure networks we analyze are very dense (especially those built with multi-platform data) so, as expected, centralization scores are low and transitivity scores are high. The modularity scores allow us to determine if the networks can be characterized by the existence of communities, that is, subsets of news outlets that are more densely connected internally than externally. The community detection algorithm that we use (8) is based on a random walker and it is particularly well suited for weighted networks like ours. The modularity scores being so close to zero suggest there is no clear community structure characterizing these networks. Most of the information in the network data we analyze lies on the edge weight distribution (e.g., the cell values in the adjacency matrix capturing the strength of audience overlap). The MRQAP models we discuss in the main text use this adjacency matrix as the dependent variable and they determine how relevant ideological similarity is in explaining the variance in the strength of those network ties.

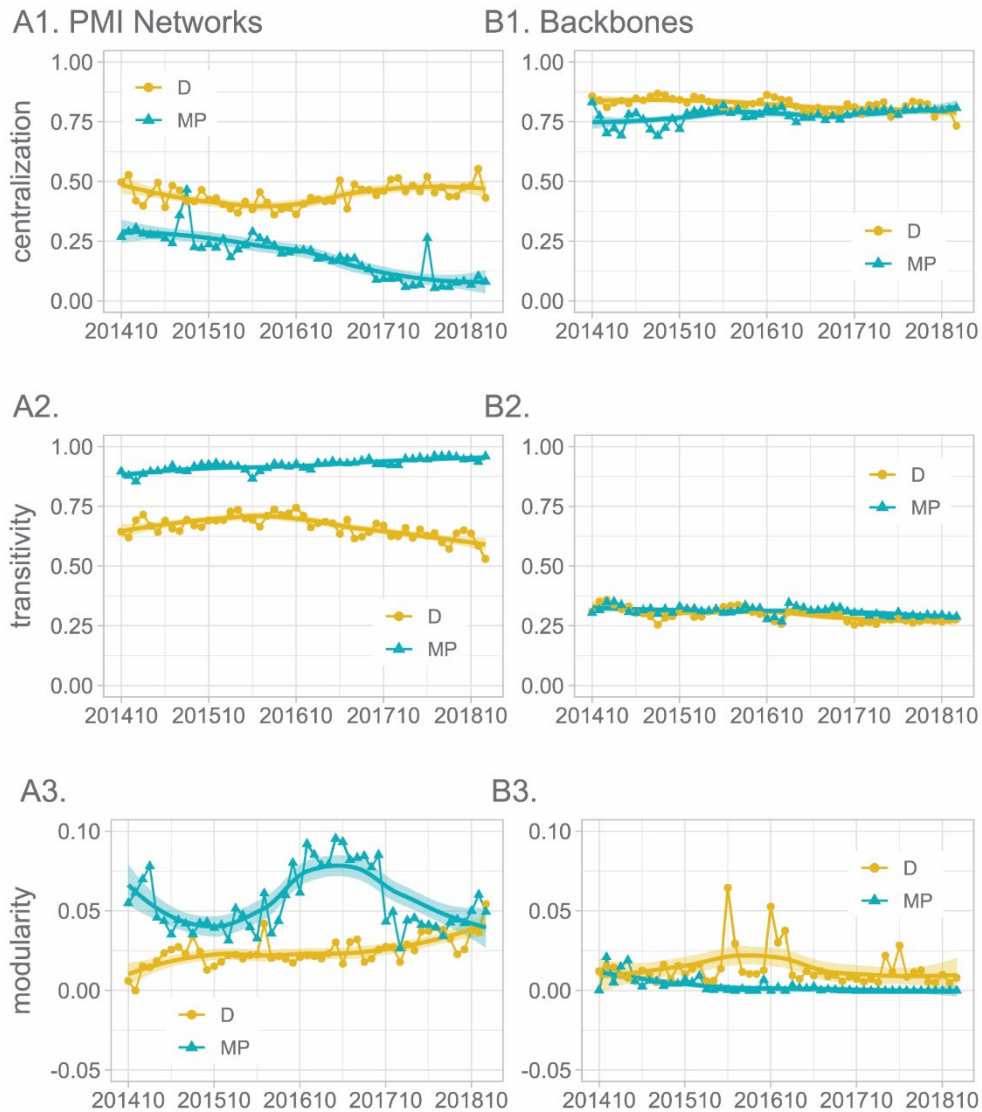

**Figure S13. Changes in Network Statistics.** The panels in this figure show changes in three network statistics for the PMI and backbone networks: centralization (upper row), transitivity (middle row), and modularity (lower row).

To give some additional context to the changes in network density we depict in the main text (which suggests mobile access significantly diversifies news diets), figure S14 summarizes survey data showing the rapid increase in mobile access to news in the past five years. These data come from two different surveys: Pew and the Reuters Digital News Report; but they are consistent in identifying how rapidly mobile access has increased for news consumption. These trends actually look qualitatively similar to the patterns we identify with our observational data: mobile is on the rise, to the detriment of desktop-only access. Our argument is that mobile access is diversifying news exposure in terms of sources, hence the rising density in the co-exposure

networks we analyze. We show that if we only use desktop data to assess fragmentation, we miss this trend – and this is important since desktop browsing data is the predominant type of data used in research until now (even though, as survey data also suggests, desktops are becoming increasingly less relevant as the main device used to consume news).

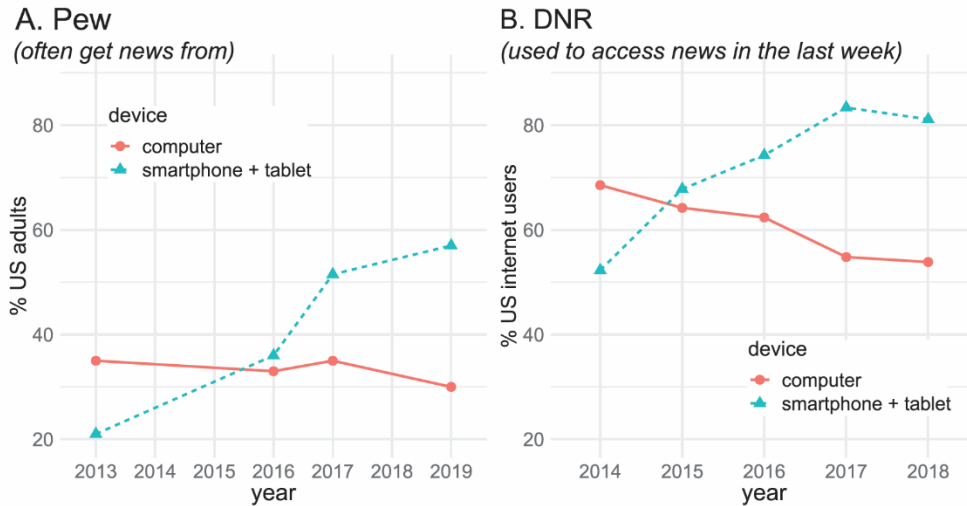

**Figure S14. Survey Data on Device Used to Access News.** Panel A shows changes in the percentage of the US population who often gets news using computer and mobile devices (smartphone and tablet), according to Pew data. Panel B shows changes in the percentage of internet users who access news using computers and mobile devices, according to the Digital News Report data.

### 3. Ideological Measures

We assess the statistical significance of the segregation scores for desktop and multi-platform data (figure 3, panels A and B in the main text) with a Wilcoxon signed rank test. This test confirms that the differences between desktop and multi-platform data are statistically significant: desktop data overestimates the segregation score for both partisanship ( $p = .003$ ) and political outlook ( $p < .001$ ). The (pseudo) median value for the discrepancy is .010 for partisanship (which is 36% of the median value of this measure for multi-platform data across all months, .027), and .009 for political outlook (which is 38% of the median value of this measure for multiplatform data across all months, .025). In other words, desktop data overestimates more than 35% of the segregation levels compared to multi-platform data.

Figure S15 compares the favorability scores (9) of news sites to the total online population. To calculate the favorability score for political outlook, we aggregated the responses ‘very liberal’ and ‘somewhat liberal’ as ‘liberal’; and the responses ‘very conservative’ and ‘somewhat conservative’ as ‘conservative’. For the most part, the audiences consuming news identify to a lesser degree with Democrats than the total online population, and they lean towards more conservative views.



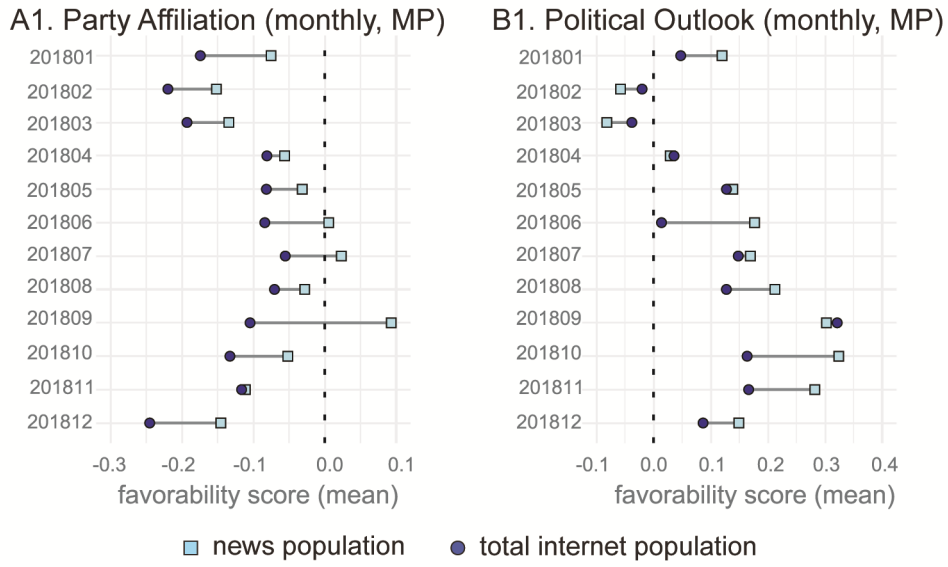

**Figure SI5. Comparison of News Consuming Population Total Online Population.** Panel A compares monthly ideological scores based on party affiliation of the news consuming population with the scores for the total internet population. Panel B compares monthly scores based on political outlook.

Figure SI6 compares Comscore’s measures of party affiliation with Gallup measures. The figure does not show serious disagreements.

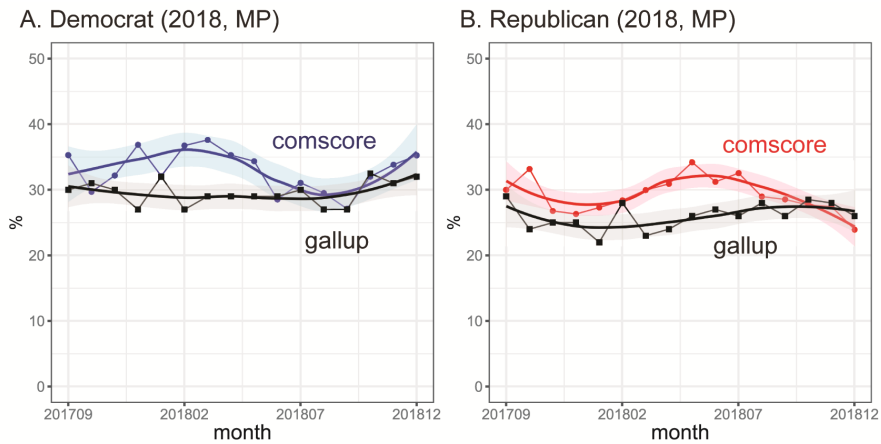

**Figure SI6. Comparison of Comscore and Gallup Measures of Party Affiliation.** Panel A shows changes in the percentage of the population who identify as democrat according to Comscore and Gallup estimates. Panel B shows changes in the percentage who identify as Republican.

Figure SI7 shows the monthly distributions of the favorability scores. They confirm that, overall, online news consumption audiences tend to lean Democratic and towards conservative views.

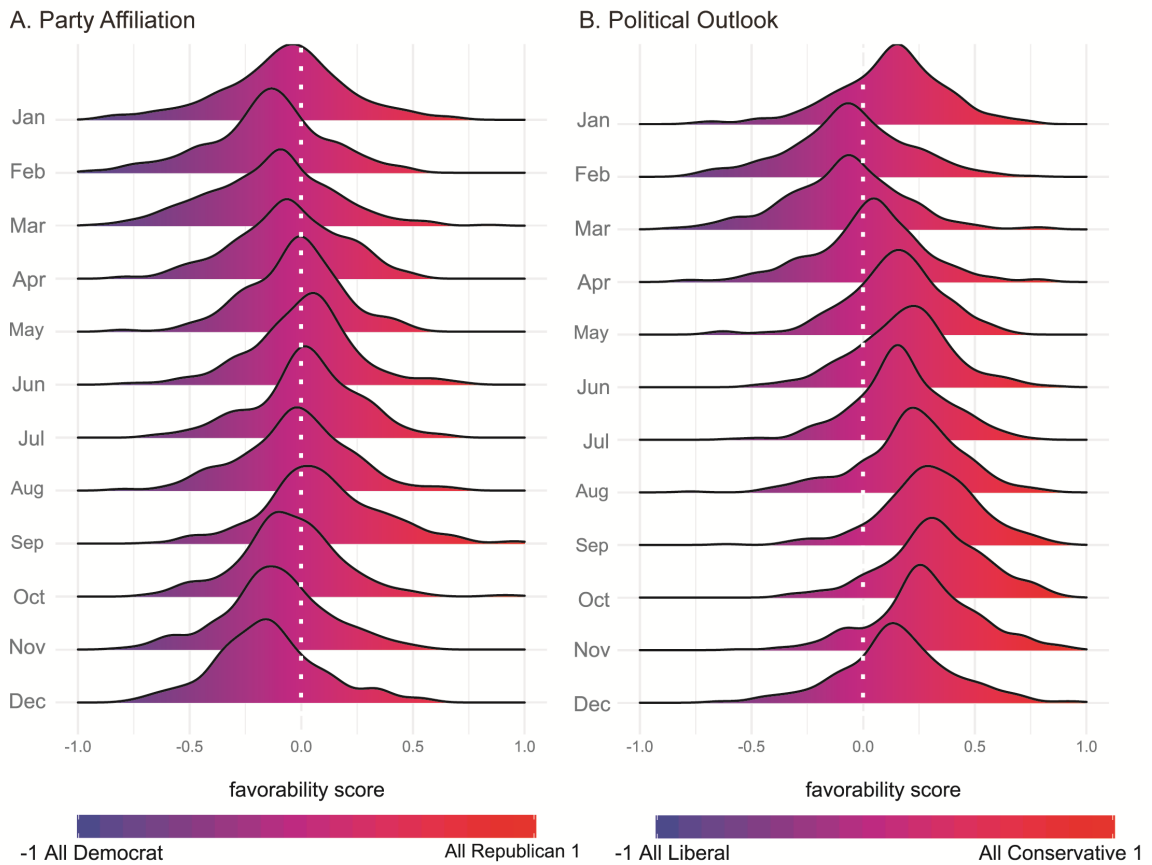

**Figure SI7. Monthly Distributions of Favorability Scores (2018, MP).** Panel A shows monthly distributions for the favorability scores of news domains according to party affiliation. Panel B shows monthly distributions for political outlook.

Even though the top news sites in terms of audience reach converge towards the median values of the favorability scores, figure SI8 shows that there is no correlation between the ideology measures and the percentage reach of news sites or the average time users spend on those domains. In section 6 we show the results of robustness tests in which we exclude from our data news sites where users spend less than the median average time. Our main results remain qualitatively unchanged.



#### 4. QAP correlations and models

The analysis of co-exposure networks precludes the use of standard statistical techniques that assume independence in the units of observation. Therefore, to test the selective exposure hypothesis we make use of multiple regression quadratic assignment procedures (MRQAP). This involves fitting a linear model for square matrix data:

$$Y = \beta_0 + \beta_1 X + \beta_2 Z + E,$$

where  $Y$ ,  $X$ ,  $Z$ , and  $E$  are  $n \times n$  matrices where the rows and columns correspond to news outlets. We use three different matrices as the dependent variable  $Y$ : the raw co-exposure network; the PMI version, and the backbone version (all derived from MP access, log-transformed). Across the three models, the matrices  $X$  and  $Z$  measure the same thing: pairwise distance in the party affiliation and political outlook scores, respectively. We assume linear dependence between the variables and, as usual, the null hypothesis is that  $\beta_1$  and  $\beta_2$  will not be statistically significant from zero (10). The permutation tests give us strong evidence that we can reject the null hypothesis.

Figure SI9 shows the QAP correlations for the raw network data.

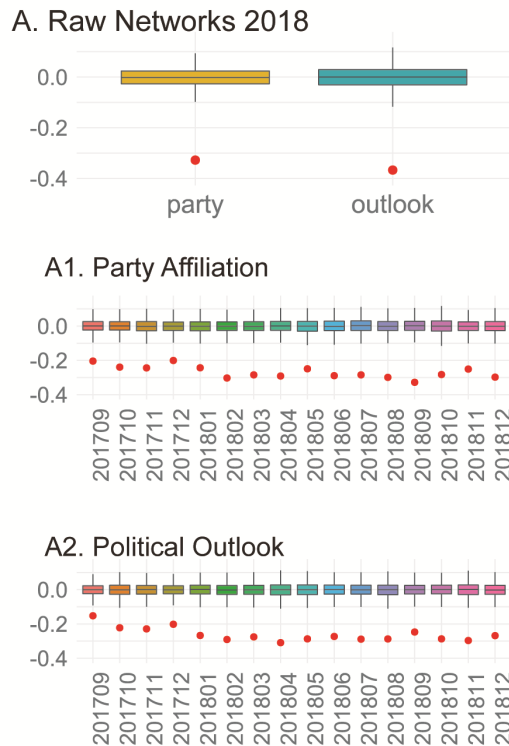

**Figure SI9. Correlation of Audience Overlap and Ideological Scores for Unfiltered Data.** The figure shows yearly and monthly correlations between pairwise distance in the favorability score distributions and audience overlap between news sites.

## 5. Node Removal Robustness Tests

In order to determine how much our results would change if a subset  $N$  of sites were removed from our data, we reproduced our main findings under the random removal of  $N = 25, 50, 75$  and 100 news sites. Figures 10 to 14 show that results remain qualitatively unchanged (the confidence intervals in these figures are based on 1,000 random iterations).

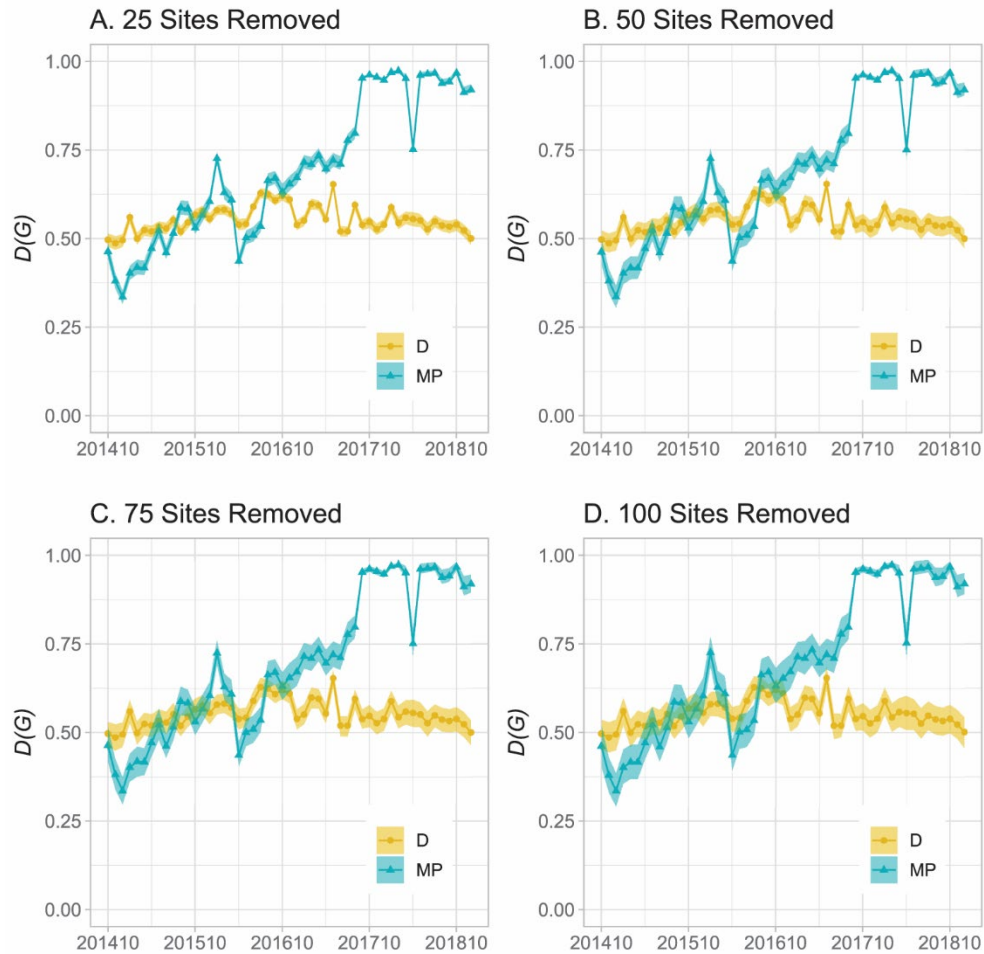

**Figure SI10. Changes in Network Density for Different Node Removal Conditions (Raw Data).** The figure shows changes in network density as a different subset of nodes  $N$  are randomly removed from the networks. Confidence intervals are based on 1,000 random iterations.

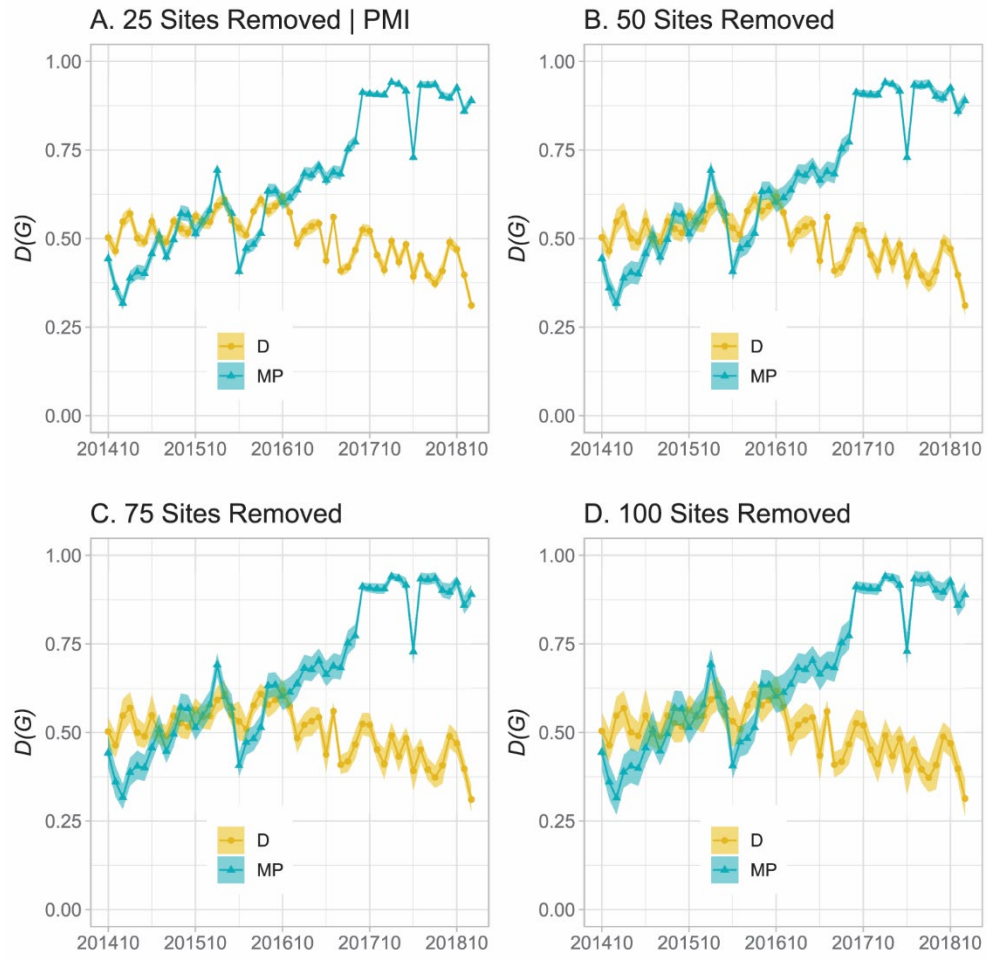

**Figure SI11. Changes in Network Density for Different Node Removal Conditions (PMI Data).** The figure shows changes in network density as a different subset of nodes  $N$  are randomly removed from the networks. Confidence intervals are based on 1,000 random iterations.

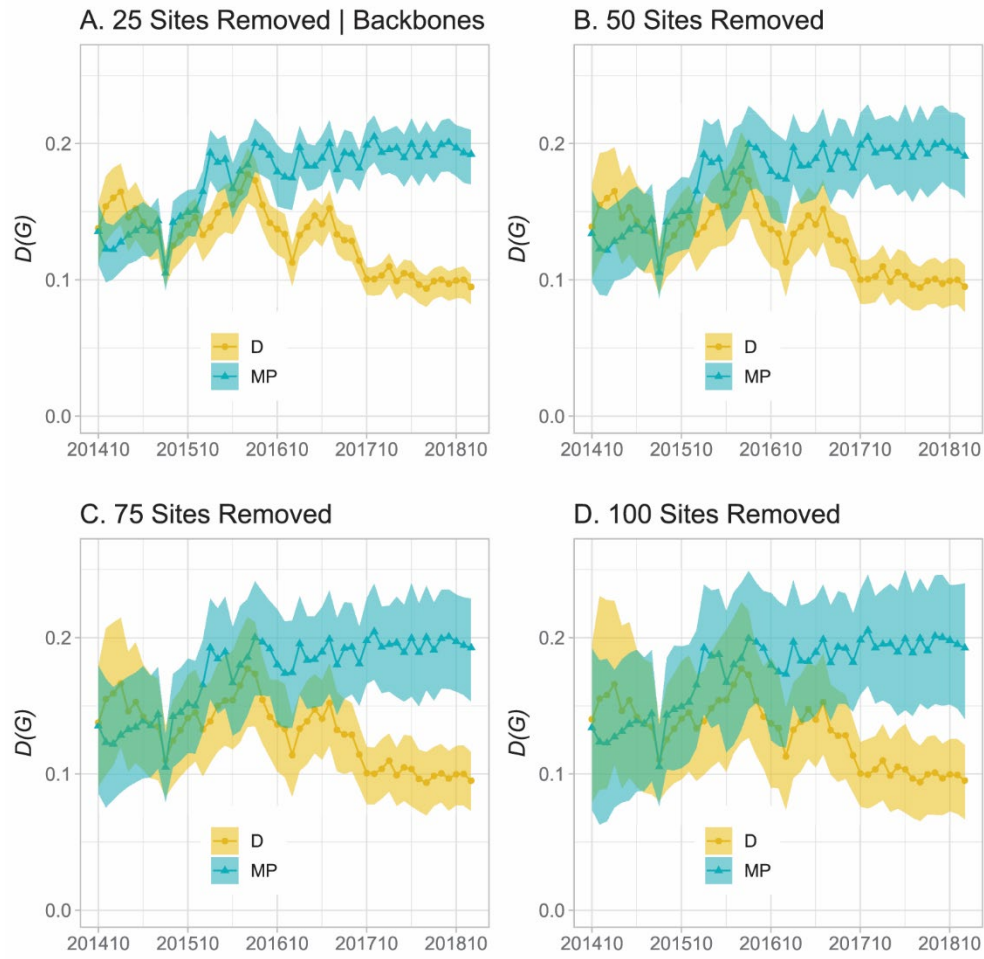

**Figure SI12. Changes in Network Density for Different Node Removal Conditions (Backbone Data).** The figure shows changes in network density as a different subset of nodes  $N$  are randomly removed from the networks. Confidence intervals are based on 1,000 random iterations.



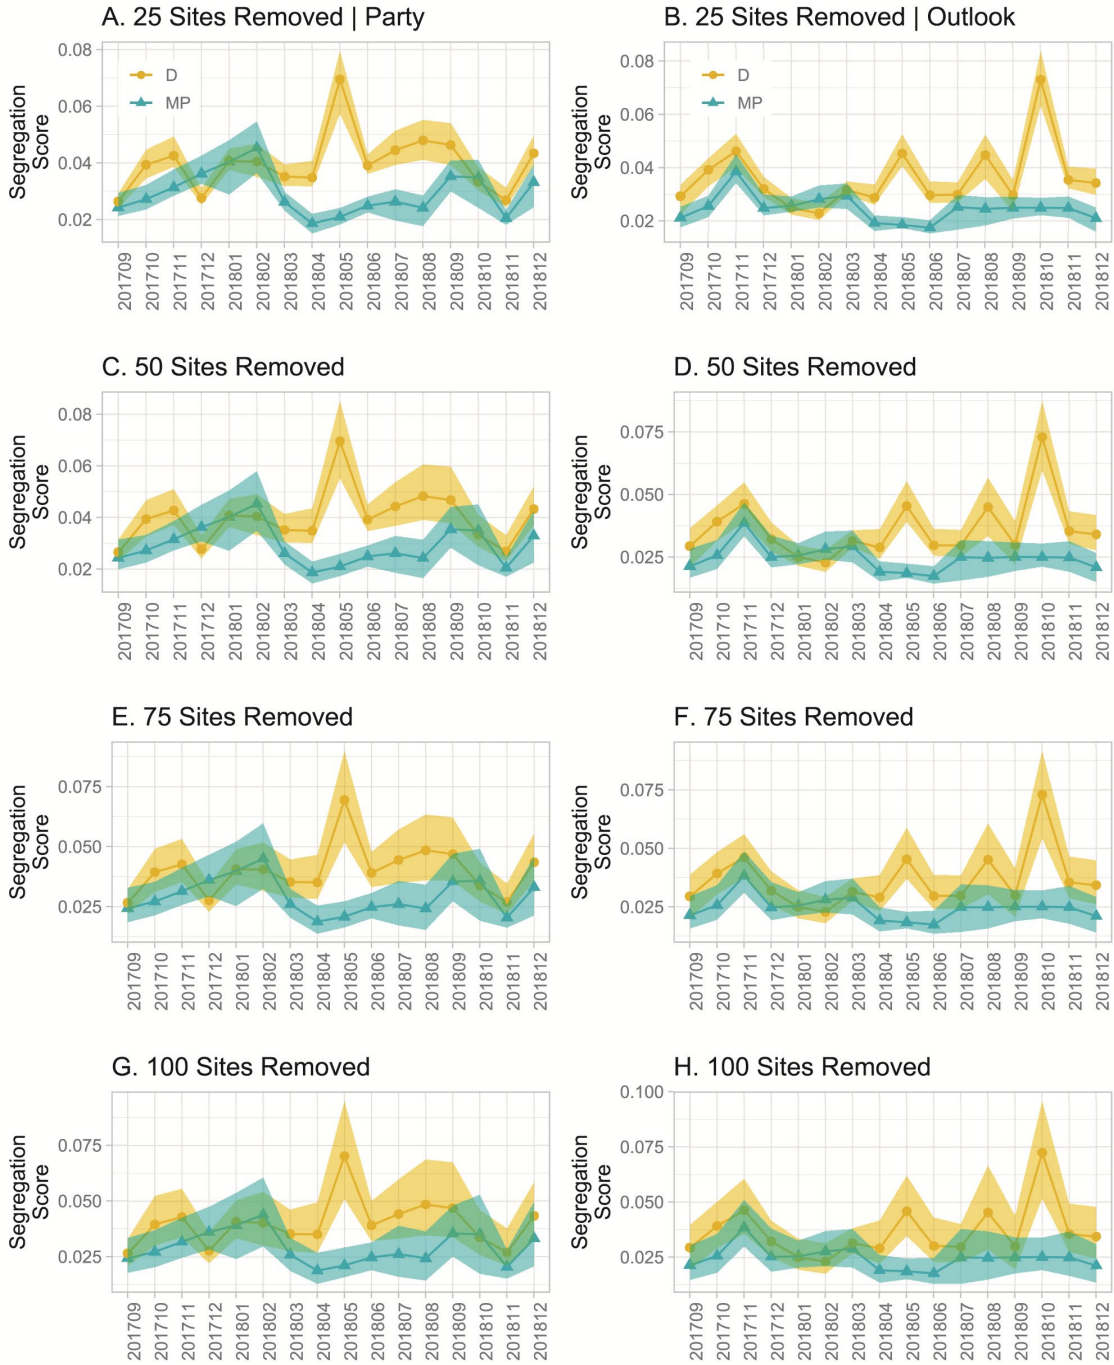

**Figure S113. Changes in Segregation Scores for Different Node Removal Conditions.** The figure shows changes in the segregation scores as a different subset of nodes  $N$  are randomly removed from the networks. Confidence intervals are based on 1,000 random iterations.



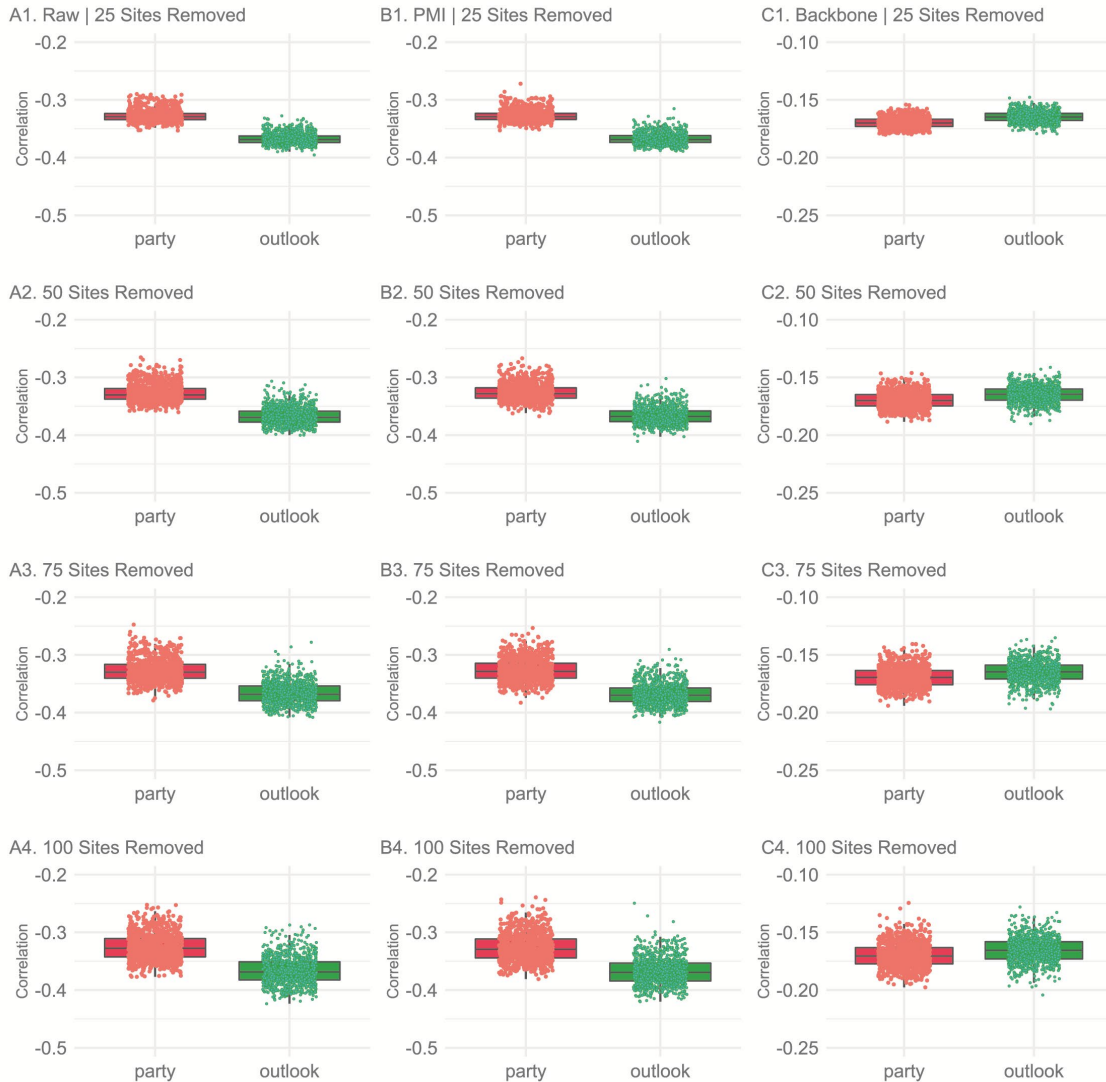

**Figure SI14. Changes in QAP Correlation for Different Node Removal Conditions.** The figure shows changes in the QAP correlations between audience overlap and pairwise distance in the favorability score distributions as a different subset  $N$  of nodes are randomly removed from the networks. Plotted values are drawn from 1,000 random iterations.

## 6. Core Network Robustness Tests

In order to determine if our main findings hold when we only pay attention to news outlets in which users spend more time (a measure that we take as a proxy to intensive use or “serious reading”), we reproduced all our analyses excluding news sites below the median time. In other words, we focus on sites on the higher half of the “average time spent” distribution. As a shorthand, we call this subset of news outlets “core network”. Figures SI15 to SI17 show the outputs of this test, which reveal that the main trends remain qualitatively unchanged. (The

Wilcoxon test for figure SI16 also suggests statistically significant differences in the median:  $p = .013$  for partisanship;  $p = .002$  for political outlook).

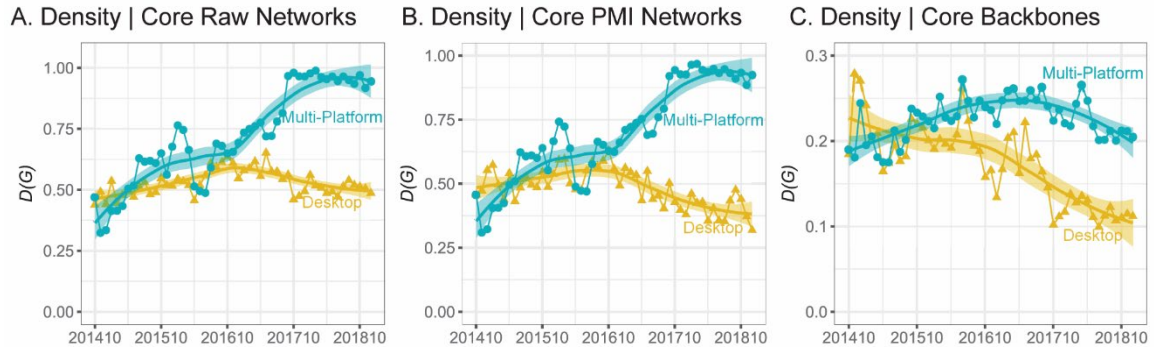

**Figure SI15. Density Trends for Core Networks.** The panels plot changes in network density for the raw network (A), the PMI networks (B), and the backbones (C) without news outlets in which audiences spend less than the median time.

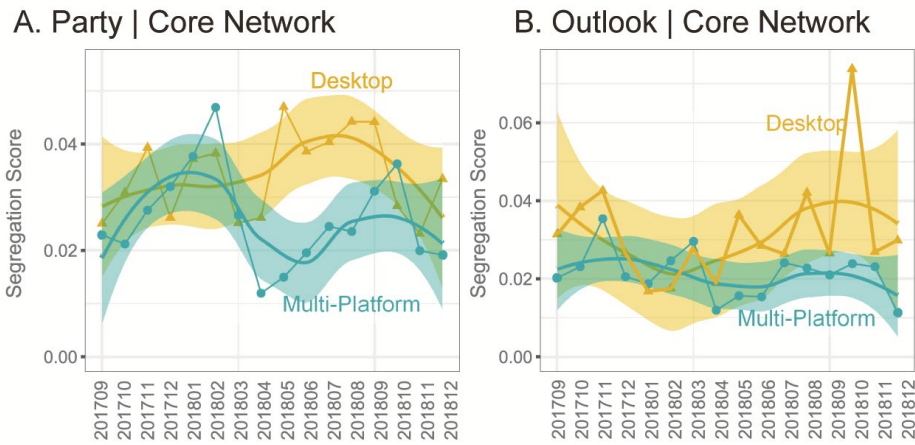

**Figure SI16. Segregation Scores for Core Networks.** The panels plot changes in the segregation score for news outlets in which audiences spend more than the median time.

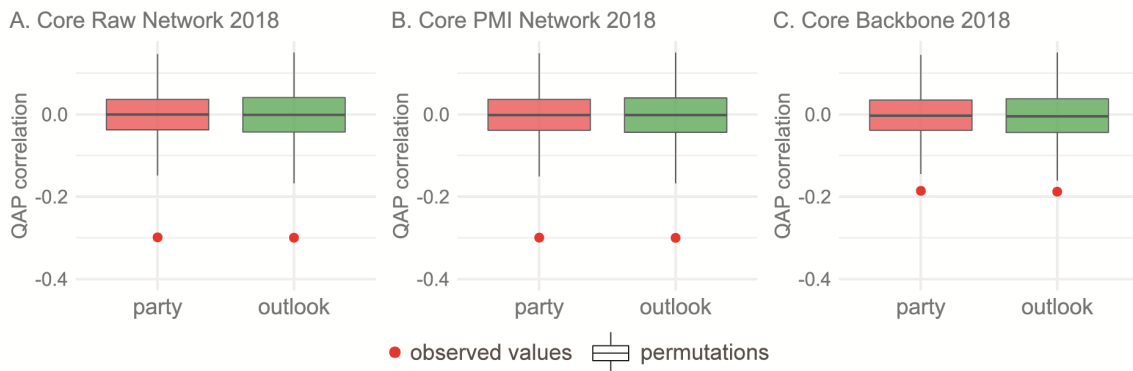

**Figure SI17. QAP Correlations for Core Networks.** The figure shows correlations between pairwise distance and favorability scores for party affiliation and political outlook considering only news sites in which audiences spend more than the median time.

## 7. References

1. Budak C, Goel S, & Rao JM (2016) Fair and Balanced? Quantifying Media Bias through Crowdsourced Content Analysis. *Public Opinion Quarterly* 80(S1):250-271.
2. Bakshy E, Messing S, & Adamic LA (2015) Exposure to ideologically diverse news and opinion on Facebook. *Science* 348(6239):1130-1132.
3. Peterson E, Goel S, & Iyengar S (2019) Partisan selective exposure in online news consumption: evidence from the 2016 presidential campaign. *Political Science Research and Methods*:1-17.
4. Grinberg N, Joseph K, Friedland L, Swire-Thompson B, & Lazer D (2019) Fake news on Twitter during the 2016 U.S. presidential election. *Science* 363(6425):374-378.
5. Serrano MÁ, Boguñá M, & Vespignani A (2009) Extracting the multiscale backbone of complex weighted networks. *Proceedings of the National Academy of Sciences* 106(16):6483-6488.
6. Freeman LC (1977) A Set of Measures of Centrality based upon Betweenness. *Sociometry* 40:35-41.
7. Barrat A, Barthélemy M, Pastor-Satorras R, & Vespignani A (2004) The architecture of complex weighted networks. *Proceedings of the National Academy of Sciences of the United States of America* 101(11):3747-3752.
8. Pons P & Latapy M (2006) Computing Communities in Large Networks Using Random Walks. *Journal of Graph Algorithms and Applications* 10(2):191-218.

9. Tyler M, Grimmer J, & Iyengar S (2019) Partisan Enclaves and Information Bazaars: Mapping Selective Exposure to Online News. *Working Paper*.
10. Dekker D, Krackhardt D, & Snijders TAB (2007) Sensitivity of MRQAP Tests to Collinearity and Autocorrelation Conditions. *Psychometrika* 72(4):563-581.
